# Supplementary material for: Targeting transdifferentiated hepatic stellate cells and monitoring the hepatic fibrogenic process by means of IGF2R-specific peptides designed in silico
Source: Royal Society of Chemistry journal article supplement (doi:10.1039/d0tb02372h), 2021-01-01
Supplement: d0tb02372h1.pdf [file d0tb02372h1.pdf]

**Electronic Supplementary Information:**

**Targeting transdifferentiated hepatic stellate cells and  
monitoring the hepatic fibrogenic process by means of  
IGF2R-specific peptides designed *in silico***

Florian Weber,<sup>a,b</sup> Tommaso Casalini,<sup>c,d</sup> Gina Valentino,<sup>a,b</sup> Lorine Brülisauer,<sup>b</sup> Nico Andreas,<sup>e</sup> Andreas Koeberle,<sup>f,g</sup> Thomas Kamradt,<sup>e</sup> Alessandro Contini,<sup>h</sup> and Paola Luciani<sup>\*a,b</sup>

---

<sup>a</sup> Department of Chemistry, Biochemistry and Pharmaceutical Sciences, University of Bern, Bern, Switzerland;

E-Mail: [paola.luciani@dcb.unibe.ch](mailto:paola.luciani@dcb.unibe.ch)

<sup>b</sup> Department of Pharmaceutical Technology, Institute of Pharmacy, Friedrich Schiller University Jena, Jena, Germany

<sup>c</sup> Institute of Mechanical Engineering and Material Technology, Department of Innovative Technology, SUPSI, Manno, Switzerland

<sup>d</sup> Institute for Chemical and Bioengineering, Department of Chemistry and Applied Biosciences, ETH Zurich, Zurich, Switzerland

<sup>e</sup> Institute of Immunology, Jena University Hospital, Jena, Germany

<sup>f</sup> Michael Popp Institute and Center for Molecular Biosciences (CMBI), University of Innsbruck, Innsbruck, Austria

<sup>g</sup> Chair of Pharmaceutical/Medicinal Chemistry, Institute of Pharmacy, Friedrich Schiller University Jena, Jena, Germany

<sup>h</sup> Dipartimento di Scienze Farmaceutiche-Sezione di Chimica Generale e Organica "A. Marchesini", Università degli Studi di Milano, Milano, Italy

Electronic Supplementary Information (ESI) available. See DOI: 10.1039/x0xx00000x

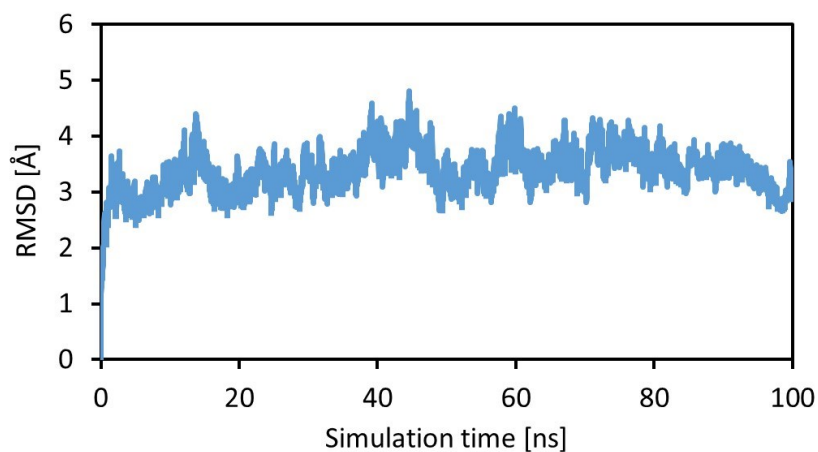

**Figure S1.** Root mean square displacement (RMSD) as function of simulation time.

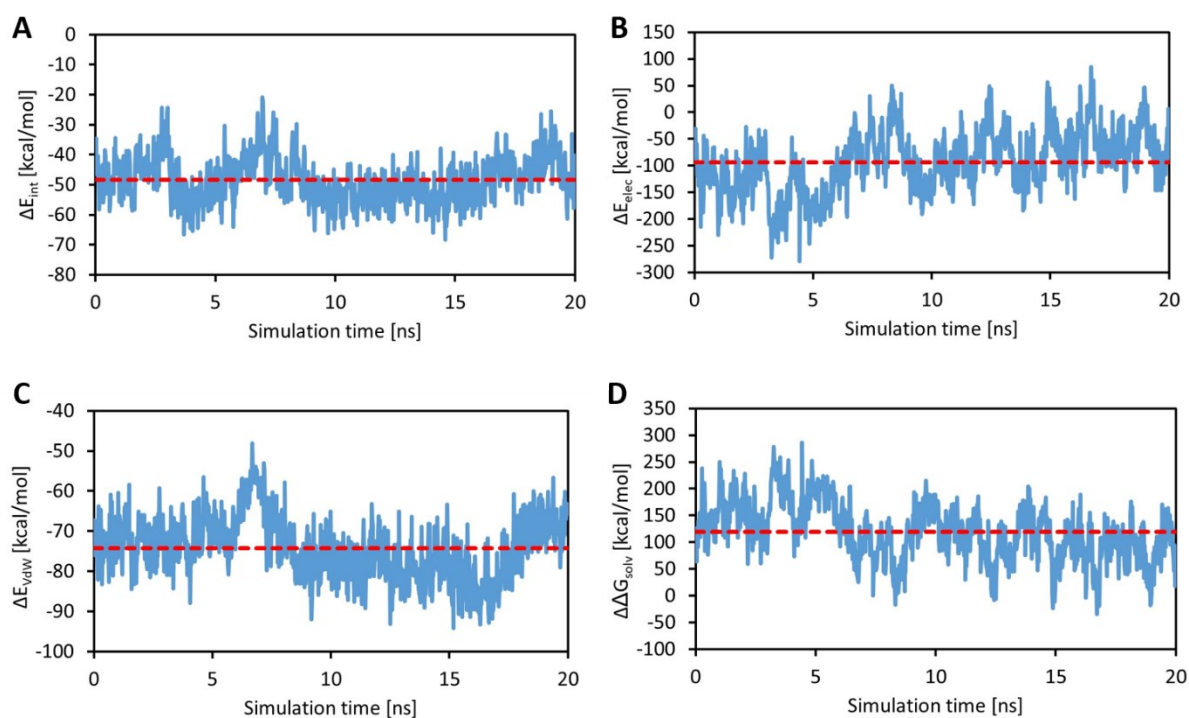

**Figure S2.** Interaction energy between IGF2R and IGF2 ( $\Delta E_{int}$ ) **(A)** along with specific electrostatic ( $\Delta E_{elec}$ ) **(B)**, van der Waals ( $\Delta E_{vdw}$ ) **(C)**, and solvation ( $\Delta\Delta G_{solv}$ ) **(D)** contributions as a function of time

for the last 20 ns of the molecular trajectory, which were employed for post-processing with MMGBSA. The red dotted line represents the average value, reported in the main text in Table 2.

**Table S1.** Pairwise interaction energy values  $\Delta E_{int}$  and specific electrostatic ( $\Delta E_{el}$ ), van der Waals ( $\Delta E_{vdw}$ ), and polar solvation ( $\Delta \Delta G_{polar}$ ) contributions resulting from per-residue decomposition; non-polar solvation terms were omitted. Only  $\Delta E_{int}$  values equal or lower than 2 kcal/mol are reported. Analysis was performed considering the last 20 ns of the molecular trajectory. Results are expressed as mean  $\pm$  standard deviation.

| Receptor | Ligand | $\Delta E_{vdw}$<br>[kcal/mol] | $\Delta E_{el}$<br>[kcal/mol] | $\Delta \Delta G_{polar}$<br>[kcal/mol] | $\Delta E_{int}$ [kcal/mol] |
|----------|--------|--------------------------------|-------------------------------|-----------------------------------------|-----------------------------|
| R1571    | E12    | 0.17 $\pm$ 0.88                | -49.49 $\pm$ 4.32             | 38.55 $\pm$ 2.13                        | -11.65 $\pm$ 2.37           |
| R1571    | E6     | 0.52 $\pm$ 0.77                | -24.87 $\pm$ 4.82             | 15.54 $\pm$ 1.58                        | -9.30 $\pm$ 3.34            |
| K1631    | E47    | -0.66 $\pm$ 0.64               | -37.83 $\pm$ 6.71             | 33.63 $\pm$ 3.51                        | -5.94 $\pm$ 3.23            |
| S1543    | D23    | -0.31 $\pm$ 0.63               | -5.99 $\pm$ 5.16              | 2.76 $\pm$ 2.27                         | -4.12 $\pm$ 3.07            |
| P1599    | L43    | -1.18 $\pm$ 0.46               | -1.94 $\pm$ 0.49              | 0.63 $\pm$ 0.10                         | -3.61 $\pm$ 0.59            |
| K1601    | D42    | -0.35 $\pm$ 0.50               | -32.66 $\pm$ 10.89            | 30.01 $\pm$ 7.92                        | -3.55 $\pm$ 3.28            |
| Q1569    | D15    | -0.53 $\pm$ 0.48               | -3.32 $\pm$ 4.58              | 1.50 $\pm$ 2.76                         | -2.95 $\pm$ 2.58            |
| K1631    | L43    | -1.53 $\pm$ 0.28               | -1.43 $\pm$ 0.64              | 1.50 $\pm$ 0.53                         | -2.76 $\pm$ 0.42            |
| H1696    | D23    | -0.85 $\pm$ 0.67               | -4.24 $\pm$ 3.34              | 3.04 $\pm$ 2.36                         | -2.72 $\pm$ 1.98            |
| Y1542    | F19    | -1.26 $\pm$ 0.29               | -0.24 $\pm$ 0.23              | 0.15 $\pm$ 0.14                         | -2.37 $\pm$ 0.59            |
| P1599    | D42    | -1.02 $\pm$ 0.24               | 0.79 $\pm$ 0.61               | -1.47 $\pm$ 0.53                        | -2.26 $\pm$ 0.31            |

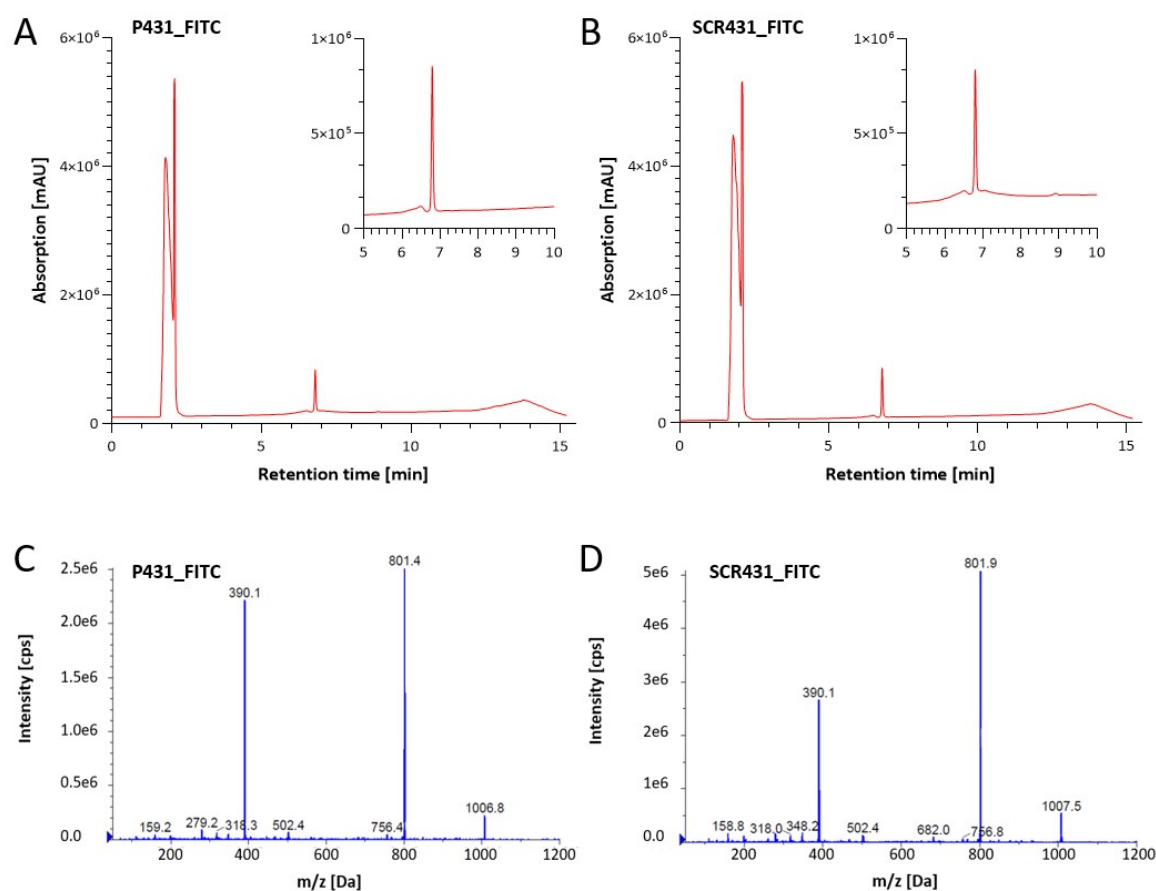

**Figure S3.** Representative chromatograms (HPLC, UV-detection,  $\lambda = 220$  nm) of the sequence P431\_FITC **(A)** and SCR431\_FITC **(B)** after purification and corresponding mass spectra **(C)** and **(D)**, respectively. The peak eluted between 2 and 3 min represents the injection peak and the solvent DMSO.

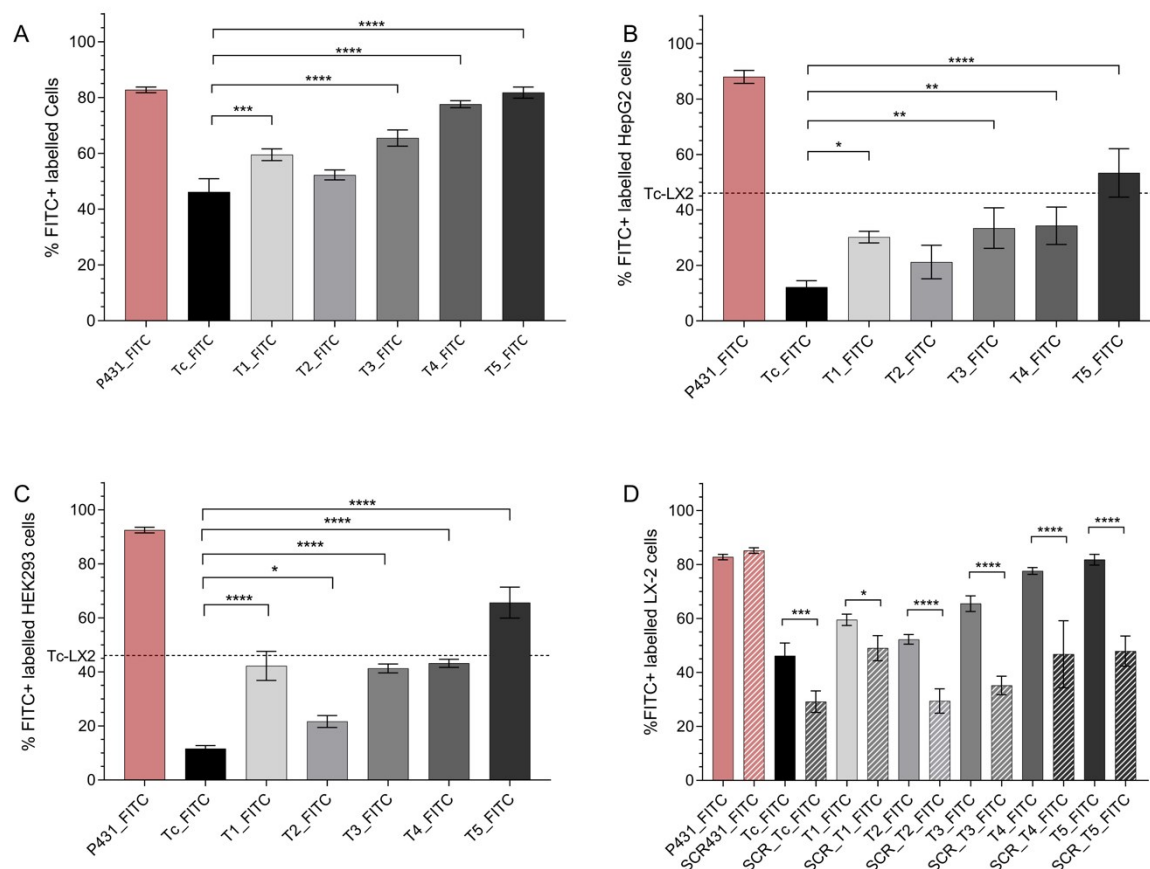

**Figure S4.** Flow cytometry data reporting %FITC+ of LX-2 cells after the incubation with targeting peptides **(A)**, %FITC+ of HepG2 cells after the incubation with targeting peptides **(B)**, %FITC+ of HEK293 cells after the incubation with targeting peptides **(C)**. **(D)** represents the %FITC+ events of LX-2 cells after the incubation with targeting peptide and their associated scrambled sequences. All cell lines were incubated with 10  $\mu$ M peptide for 1 h at 37  $^{\circ}$ C. The dotted line represents the %FITC+ events of LX-2 cells after the incubation with 10  $\mu$ M **Tc** (lowest %FITC+ on LX-2 cells). All sequences except **P431** and **T5** show a lower binding to HepG2 cells and HEK293 cells in respect to LX-2 cells.

**Table S2.** Displayed are the results of the multiple comparison test (one-way ANOVA, Holm-Sidak's multiple comparison test) for LX-2 cells after incubation with targeting peptides. The concentration of the peptides was 10  $\mu$ M (1 h, 37 °C). Results were obtained by flow cytometry.

| Multiple comparisons  | Mean Diff. | Summary | Adjusted P value |
|-----------------------|------------|---------|------------------|
| P431_FITC vs. Tc_FITC | 36.6       | ****    | <0.0001          |
| P431_FITC vs. T1_FITC | 23.27      | ****    | <0.0001          |
| P431_FITC vs. T2_FITC | 30.5       | ****    | <0.0001          |
| P431_FITC vs. T3_FITC | 17.27      | ****    | <0.0001          |
| P431_FITC vs. T4_FITC | 5.17       | ns      | 0.051            |
| P431_FITC vs. T5_FITC | 1          | ns      | 0.6144           |
| Tc_FITC vs. T1_FITC   | −13.33     | ****    | <0.0001          |
| Tc_FITC vs. T2_FITC   | −6.1       | *       | 0.0316           |
| Tc_FITC vs. T3_FITC   | −19.33     | ****    | <0.0001          |
| Tc_FITC vs. T4_FITC   | −31.43     | ****    | <0.0001          |
| Tc_FITC vs. T5_FITC   | −35.6      | ****    | <0.0001          |
| T1_FITC vs. T2_FITC   | 7.23       | *       | 0.0112           |
| T1_FITC vs. T3_FITC   | −6         | *       | 0.0316           |
| T1_FITC vs. T4_FITC   | −18.1      | ****    | <0.0001          |
| T1_FITC vs. T5_FITC   | −22.27     | ****    | <0.0001          |
| T2_FITC vs. T3_FITC   | −13.23     | ****    | <0.0001          |
| T2_FITC vs. T4_FITC   | −25.33     | ****    | <0.0001          |
| T2_FITC vs. T5_FITC   | −29.5      | ****    | <0.0001          |
| T3_FITC vs. T4_FITC   | −12.1      | ****    | <0.0001          |
| T3_FITC vs. T5_FITC   | −16.27     | ****    | <0.0001          |
| T4_FITC vs. T5_FITC   | −4.167     | ns      | 0.0938           |

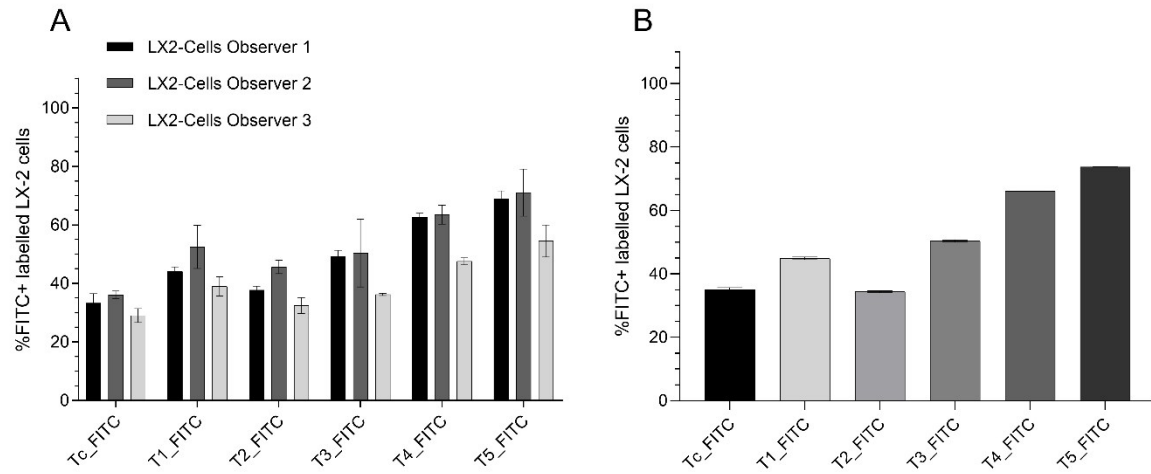

**Figure S5.** Flow cytometry data reporting %FITC+ of LX-2 cells after the incubation with targeting peptides by different observers **(A)** and in a different lab **(B)**. All cell lines were incubated with 10  $\mu$ M peptide for 1 h at 37  $^{\circ}$ C.

**Table S3.** Displayed are the results of the multiple comparison test (one-way ANOVA, Holm-Sidak's multiple comparison test) for the ratios ( $R_{Active}$ ) of %FITC+  $TGF-\beta_1$ / %FITC+  $Rol+PA$  after the incubation with FITC-labelled peptide at a concentration of 10  $\mu M$  for 1 h at 37 °C. Prior to the incubation, cells were transdifferentiated into the perpetuated state with 10 ng/mL  $TGF-\beta_1$  or into the quiescent-like state with Rol (10  $\mu M$ ) and PA (300  $\mu M$ ) for 24 h.  $R_{Active} > 1$  represent a specific selectivity for the perpetuated phenotype of the LX-2 cell line. Results were obtained by flow cytometry.

| Multiple comparisons  | Mean Diff. | Summary | Adjusted P Value |
|-----------------------|------------|---------|------------------|
| P431_FITC vs. Tc_FITC | -1.22      | ****    | <0.0001          |
| P431_FITC vs. T1_FITC | -0.59      | ****    | <0.0001          |
| P431_FITC vs. T2_FITC | -0.54      | ****    | <0.0001          |
| P431_FITC vs. T3_FITC | -0.18      | *       | 0.0215           |
| P431_FITC vs. T4_FITC | -0.26      | **      | 0.002            |
| P431_FITC vs. T5_FITC | 0.04       | ns      | 0.6626           |
| Tc_FITC vs. T1_FITC   | 0.63       | ****    | <0.0001          |
| Tc_FITC vs. T2_FITC   | 0.68       | ****    | <0.0001          |
| Tc_FITC vs. T3_FITC   | 1.04       | ****    | <0.0001          |
| Tc_FITC vs. T4_FITC   | 0.96       | ****    | <0.0001          |
| Tc_FITC vs. T5_FITC   | 1.26       | ****    | <0.0001          |
| T1_FITC vs. T2_FITC   | 0.05       | ns      | 0.6626           |
| T1_FITC vs. T3_FITC   | 0.41       | ****    | <0.0001          |
| T1_FITC vs. T4_FITC   | 0.38       | ***     | 0.0003           |
| T1_FITC vs. T5_FITC   | 0.63       | ****    | <0.0001          |
| T2_FITC vs. T3_FITC   | 0.36       | ***     | 0.0001           |
| T2_FITC vs. T4_FITC   | 0.28       | **      | 0.0011           |
| T2_FITC vs. T5_FITC   | 0.59       | ****    | <0.0001          |
| T3_FITC vs. T4_FITC   | -0.08      | ns      | 0.4433           |
| T3_FITC vs. T5_FITC   | 0.23       | **      | 0.0054           |
| T4_FITC vs. T5_FITC   | 0.30       | ***     | 0.0006           |



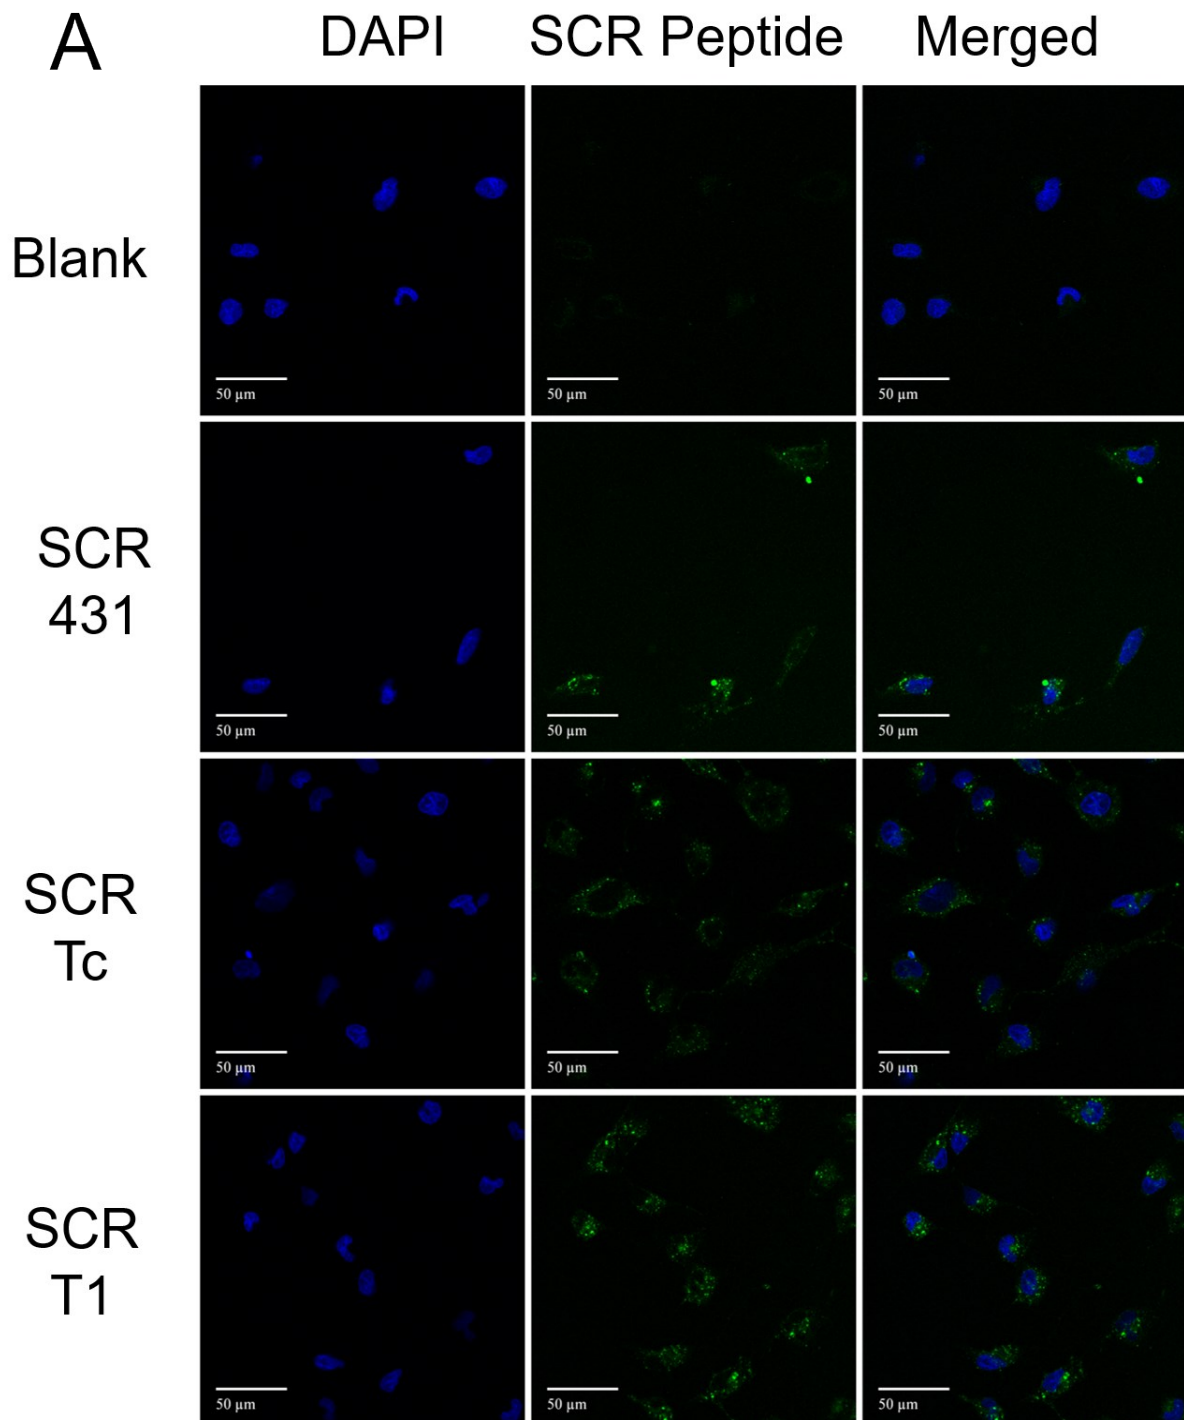

**Figure S6A.** Representative confocal microscopy images of naive LX-2 cells after a 1 h treatment (37 °C) with the scrambled sequence of **P431**, **Tc**, or **T1** at a concentration of 10  $\mu$ M. Displayed are the summary z-stacks (> 20 single images per z-stack) for all tested sequences. Left panel: cell nucleus stained with DAPI (blue); middle panel: FITC-labelled peptide (green); right panel: merged images. Scale bar = 50  $\mu$ m.

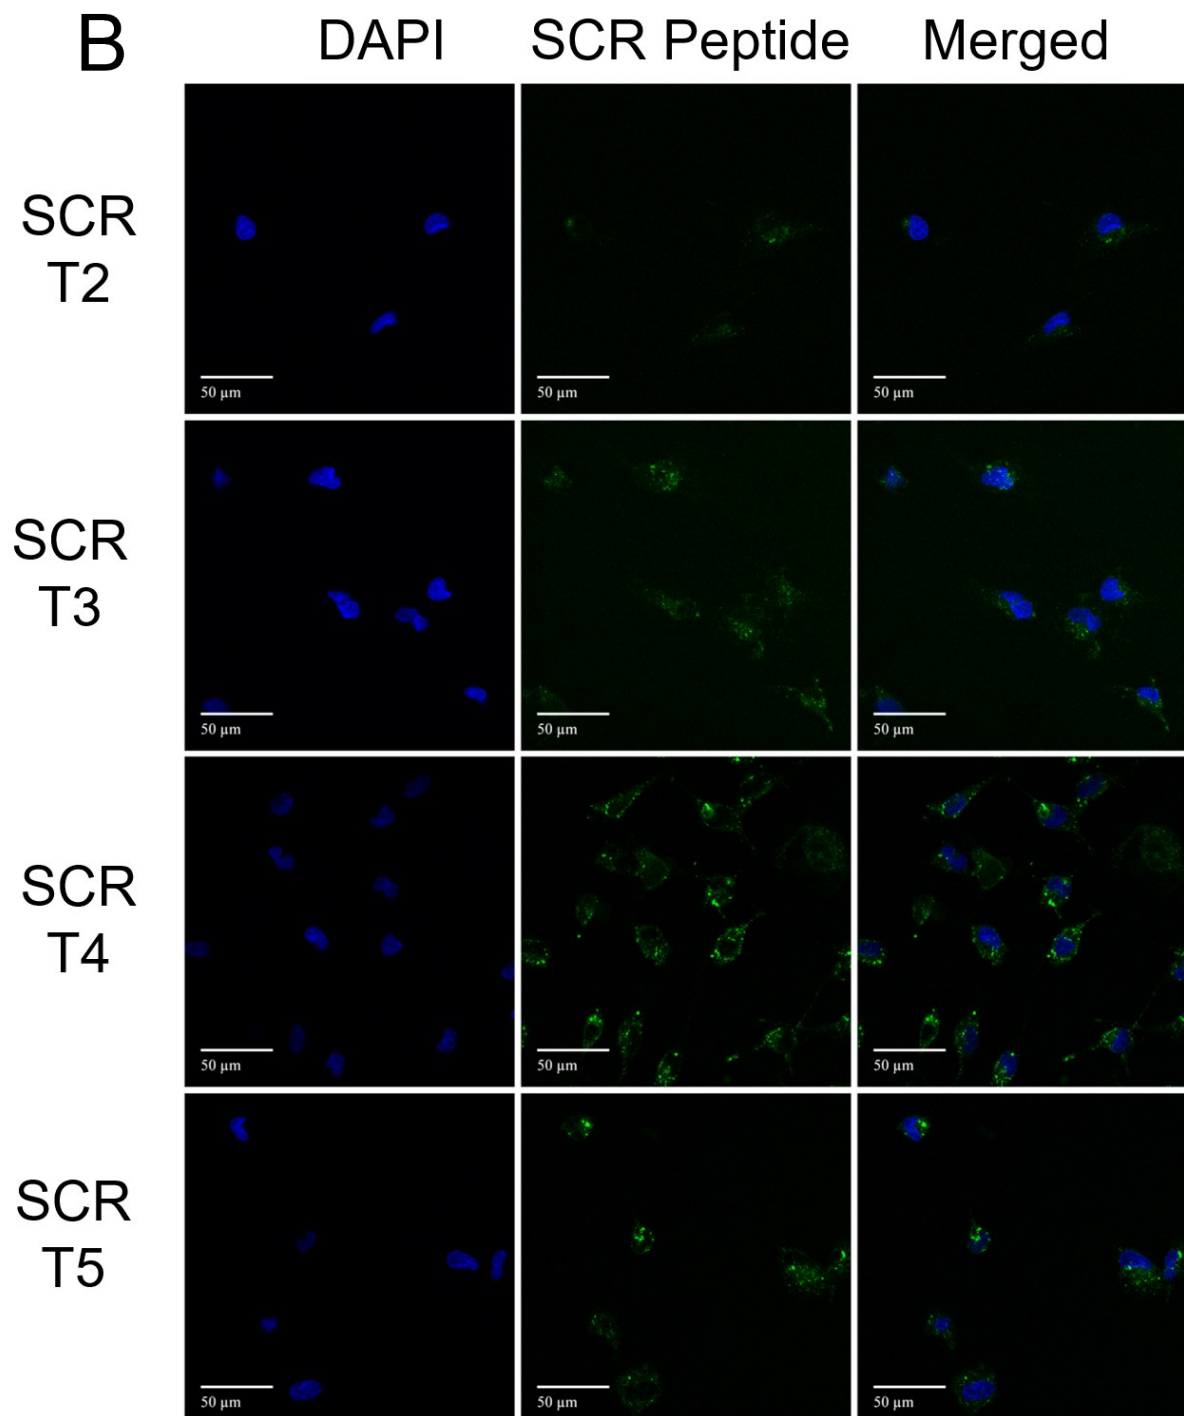

**Figure S6B.** Representative confocal microscopy images of naive LX-2 cells after a 1-h treatment (37 °C) with the scrambled sequence of **T2**, **T3**, **T4**, or **T5** at a concentration of 10 μM. Displayed are the summary z-stacks (> 20 single images per z-stack) for all tested sequences. Left panel: cell nucleus stained with DAPI (blue); middle panel: FITC-labelled peptide (green); right panel: merged images. Scale bar = 50 μm.

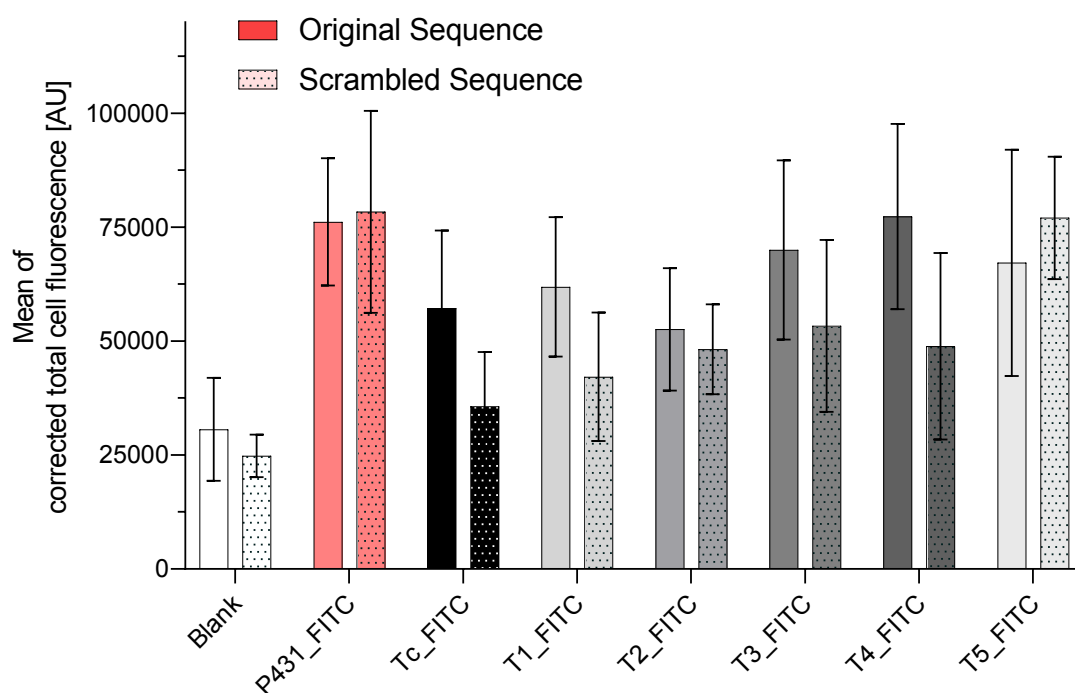

**Figure S7.** Quantification of the confocal images of LX-2 cells treated with 10  $\mu$ M FITC-labelled peptides and their corresponding scrambled sequences in PBS for 1 h at 37 °C. Mean of corrected total cell fluorescence (CTCF) of the FITC-signal for all sequences and scrambled sequences were acquired using ImageJ (> 20 images per z-stack). Although no statistically significant differences between the various peptides and their associated scrambled sequences could be obtained for the CTCF analysis (ordinary one-way ANOVA with Tukey multiple comparison test), the obtained pattern of the fluorescence intensity for all peptides is comparable with the flow cytometry data (Figure 5A).

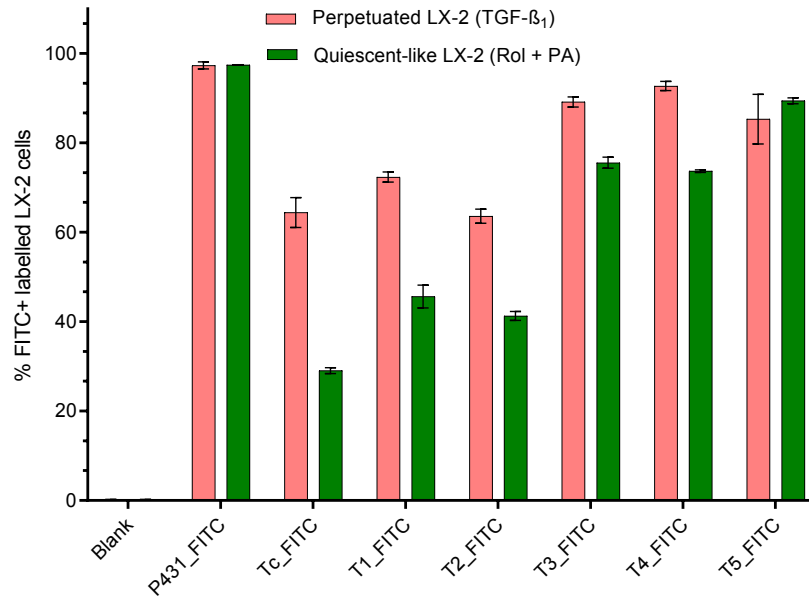

**Figure S8.** Flow cytometry data expressing %FITC+ perpetuated or quiescent-like LX-2 cells after incubation with targeting peptides. Naïve LX-2 cells were transdifferentiated into the perpetuated state with 10 ng/mL TGF- $\beta_1$  or into the quiescent-like state with Rol (10  $\mu$ M) and PA (300  $\mu$ M) for 24 h at 37 °C prior to the incubation with peptides. All transdifferentiated cells were then incubated with 10  $\mu$ M peptide for 1 h at 37 °C.
